# Supplementary material for: Bayesian refinement of protein structures and ensembles against SAXS data using molecular dynamics
Source: PubMed Central journal article supplement (PMC5662244; doi:10.1371/journal.pcbi.1005800), 2017-10-18
Supplement: pcbi.1005800.s001.pdf [file pcbi.1005800.s001.pdf]

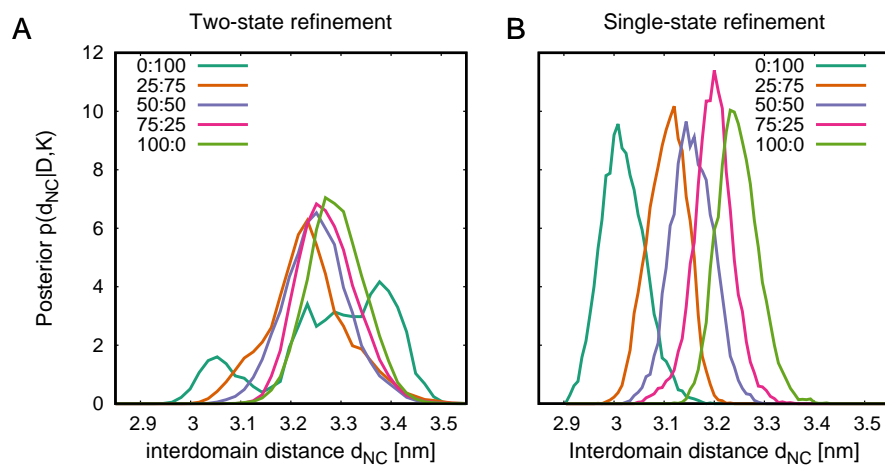

**Figure S1. Marginalized posteriors of the interdomain distance  $d_{NC}$  of the refined open state, taken from two-state and single-state refinement simulations of LBP.** (A) Marginalized posteriors of the interdomain distance  $d_{NC}$  of the refined open state, taken from two-state refinement simulations of LBP. In ensembles refined against SAXS curves of non-zero open-state content (25:75 through 100:0), the posteriors peak near the physically correct  $d_{NC}$  of  $\sim 3.25$  nm of the open state. In the ensemble refined against the SAXS curve of purely the closed state (0:100), the refined weight of the open state is near zero (Fig. 3A of main text), suggesting that the simulation of the open state is hardly restrained by the SAXS curve or, equivalently, is essentially a free simulation. Consequently, the posterior of  $d_{NC}$  (A, dark green) is wide and reflects both closed and open states.
