# Supplementary material for: Bayesian refinement of protein structures and ensembles against SAXS data using molecular dynamics
Source: PubMed Central journal article supplement (PMC5662244; doi:10.1371/journal.pcbi.1005800), 2017-10-18
Supplement: pcbi.1005800.s002.pdf [file pcbi.1005800.s002.pdf]

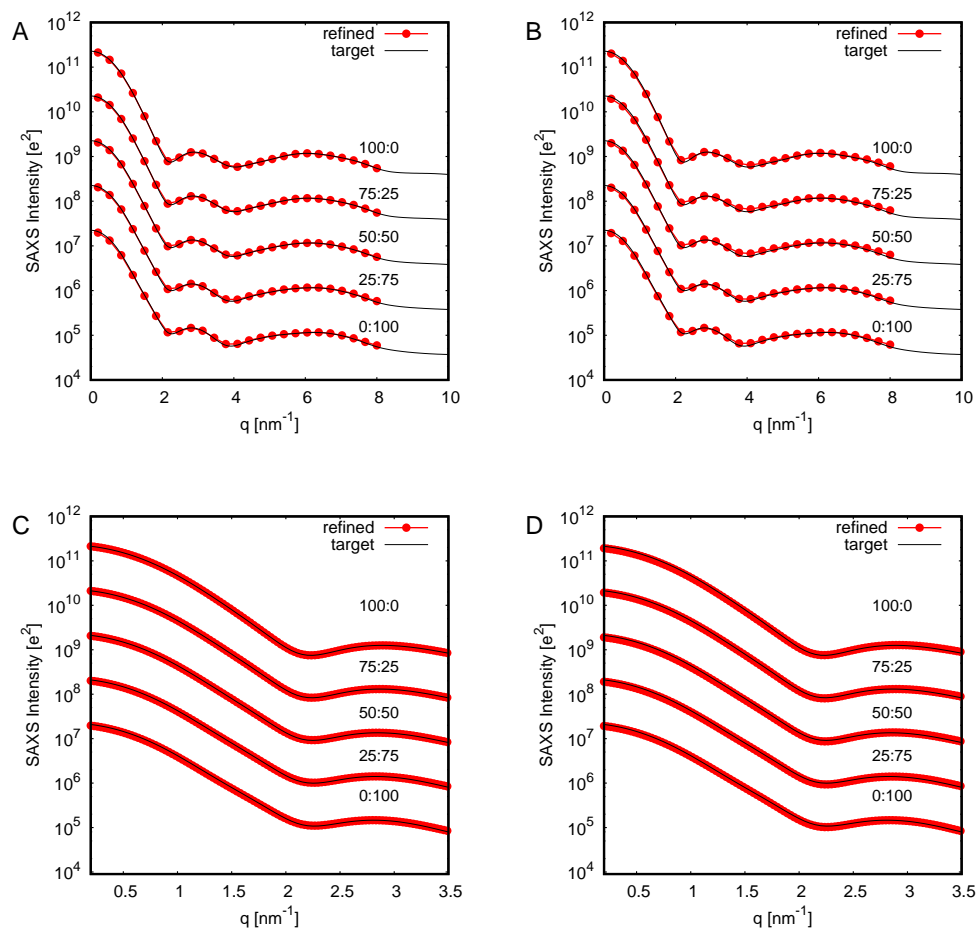

**Figure S2. Target SAXS curves (black lines) and calculated SAXS curves of the refined structures and ensembles (red dots) of leucine binding protein.** (A/C) Two-state ensemble refinement. (B/D) Single-state refinement. SAXS curves with open weight  $\geq 25\%$  were offset for clarity. The lower row (C/D) shows a close-up view on the small-angle regime.
