# Supplementary material for: Bayesian refinement of protein structures and ensembles against SAXS data using molecular dynamics
Source: PubMed Central journal article supplement (PMC5662244; doi:10.1371/journal.pcbi.1005800), 2017-10-18
Supplement: pcbi.1005800.s003.pdf [file pcbi.1005800.s003.pdf]

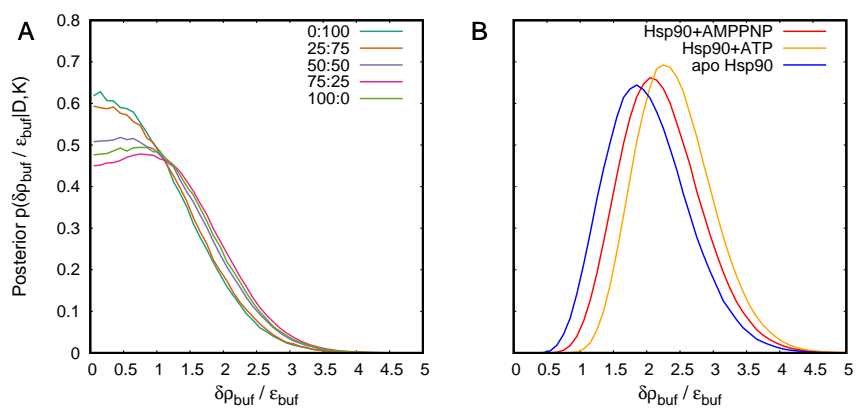

**Figure S3. Posterior of  $\delta\rho_{\text{buf}}/\epsilon_{\text{buf}}$  during two state refinement of LBP and Hsp90 refinement.** For LBP, the ensembles were refined against theoretically computed SAXS curves, thus exhibiting no buffer density mismatch, rationalizing why the posteriors peak near  $\delta\rho_{\text{buf}} = 0$ . For Hsp90, in contrast, the ensembles were refined against experimental data that presumably exhibit some systematic errors, for instance due to a small buffer density mismatch. Hence, the posteriors peak at nonzero  $\delta\rho_{\text{buf}}$ .
