# Supplementary material for: Bayesian refinement of protein structures and ensembles against SAXS data using molecular dynamics
Source: PubMed Central journal article supplement (PMC5662244; doi:10.1371/journal.pcbi.1005800), 2017-10-18
Supplement: pcbi.1005800.s004.pdf [file pcbi.1005800.s004.pdf]

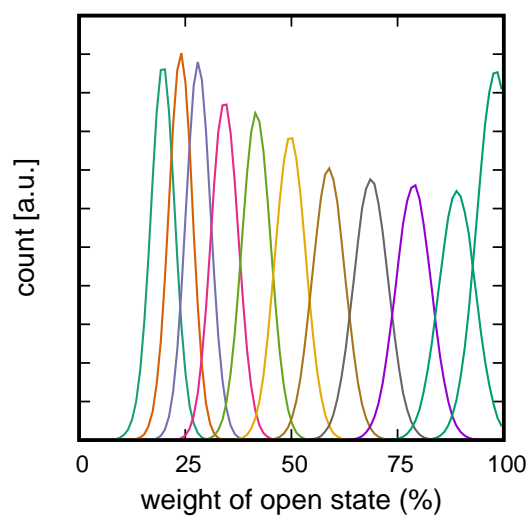

**Figure S4. Example of umbrella histograms.** Umbrella histograms along the weight of the open state, here taken from the two-state refinement of LBP against the open/closed 50:50 SAXS curve.
