# Supplementary material for: Bayesian refinement of protein structures and ensembles against SAXS data using molecular dynamics
Source: PubMed Central journal article supplement (PMC5662244; doi:10.1371/journal.pcbi.1005800), 2017-10-18
Supplement: pcbi.1005800.s006.pdf [file pcbi.1005800.s006.pdf]

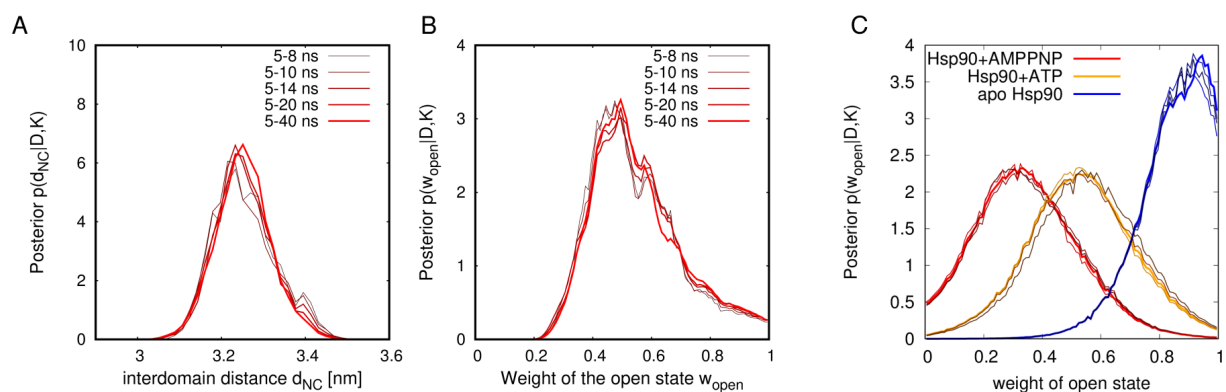

**Figure S6. Analysis of the convergence of posterior distributions with increasing invested simulation time.** (A/B) Marginalized posteriors for LBP refined against the SAXS curve with 50:50 open/closed weight (Fig. 2D, middle panel), computed from time bins as indicated in the legend. (A) Posterior of the interdomain distance  $d_{NC}$  and (B) of the weight of the open state  $w_{open}$ . (C) Marginalized posteriors of  $w_{open}$  for different liganded states of Hsp90 as indicated in the legend. The thin lines indicate posteriors computed from an increasing number of histograms: 10 equally spaced histograms, the same 10 plus additional three histograms near the posterior maximum, 10 plus 6 additional histograms, and 10 plus 9 additional histograms near the posterior maximum. The similarity between the posteriors suggest that the posteriors are reasonably converged.
