# Supplementary material for: Bayesian refinement of protein structures and ensembles against SAXS data using molecular dynamics
Source: PubMed Central journal article supplement (PMC5662244; doi:10.1371/journal.pcbi.1005800), 2017-10-18
Supplement: pcbi.1005800.s007.pdf [file pcbi.1005800.s007.pdf]

| True $w_{\text{open}}$ | maximum | 65% interval |     | 95% interval |     |
|------------------------|---------|--------------|-----|--------------|-----|
| 0                      | 0       | 0            | 6   | 0            | 35  |
| 25                     | 24      | 17           | 42  | 11           | 79  |
| 50                     | 50      | 39           | 68  | 30           | 92  |
| 75                     | 70      | 56           | 86  | 44           | 97  |
| 100                    | 100     | 83           | 100 | 67           | 100 |

Table S1: Maxima and confidence intervals of  $w_{\text{open}}$ , taken from  $p(w_{\text{open}}|D, K)$  of the two-state ensemble refinement of LBP. All numbers in %. The respective posteriors are shown in Fig. 3A of the main text.
