# Supplementary material for: Bayesian refinement of protein structures and ensembles against SAXS data using molecular dynamics
Source: PubMed Central journal article supplement (PMC5662244; doi:10.1371/journal.pcbi.1005800), 2017-10-18
Supplement: pcbi.1005800.s008.pdf [file pcbi.1005800.s008.pdf]

Table S2: Maxima and confidence intervals of  $d_{\text{NC}}$ , taken from  $p(d_{\text{NC}}|D, K)$  of the two-state ensemble refinement of LBP. All interdomain distances  $d_{\text{NC}}$  in nanometer. During two-state refinement, in simulations with non-zero  $w_{\text{open}}$ , the posterior of the interdomain distance  $p(d_{\text{NC}}|D, K)$  of the open state peaks at the physically correct  $d_{\text{NC}} \approx 3.25$  nm. The respective posteriors are shown in Fig. S1A.

| True $w_{\text{open}}$ (%) | True mean $d_{\text{NC}}$ | maximum | 65% interval |      | 95% interval |      |
|----------------------------|---------------------------|---------|--------------|------|--------------|------|
| 0                          | 3.25                      | 3.38    | 3.21         | 3.44 | 3.01         | 3.48 |
| 25                         | 3.25                      | 3.23    | 3.15         | 3.33 | 3.06         | 3.42 |
| 50                         | 3.25                      | 3.25    | 3.17         | 3.33 | 3.12         | 3.40 |
| 75                         | 3.25                      | 3.25    | 3.19         | 3.33 | 3.15         | 3.40 |
| 100                        | 3.25                      | 3.27    | 3.21         | 3.35 | 3.15         | 3.42 |
