# Supplementary material for: Bayesian refinement of protein structures and ensembles against SAXS data using molecular dynamics
Source: PubMed Central journal article supplement (PMC5662244; doi:10.1371/journal.pcbi.1005800), 2017-10-18
Supplement: pcbi.1005800.s009.pdf [file pcbi.1005800.s009.pdf]

Table S3: Maxima and confidence intervals of  $d_{\text{NC}}$  taken from  $p(d_{\text{NC}}|D, K)$  of the single-state refinement of LBP. All interdomain distances  $d_{\text{NC}}$  in nanometer. Refining a single state against SAXS curves that, in truth, represent a heterogeneous ensemble of open/closed states, yields posterior distributions that peak at the “mean” interdomain distance  $\langle d_{\text{NC}} \rangle = w_{\text{open}} d_{\text{NC}}^{\text{open}} + (1 - w_{\text{open}}) d_{\text{NC}}^{\text{closed}}$ , where  $d_{\text{NC}}^{\text{open}}$  and  $d_{\text{NC}}^{\text{closed}}$  denote the mean interdomain distances of the open and closed states, in free simulations, respectively. The respective posteriors are shown in Fig. S1B.

| True $w_{\text{open}}$ (%) | mean $\langle d_{\text{NC}} \rangle$ | maximum | 65% interval |      | 95% interval |      |
|----------------------------|--------------------------------------|---------|--------------|------|--------------|------|
| 0                          | 3                                    | 3.01    | 2.96         | 3.06 | 2.93         | 3.12 |
| 25                         | 3.0625                               | 3.12    | 3.07         | 3.16 | 3.03         | 3.19 |
| 50                         | 3.125                                | 3.14    | 3.10         | 3.20 | 3.06         | 3.24 |
| 75                         | 3.1875                               | 3.20    | 3.16         | 3.24 | 3.11         | 3.28 |
| 100                        | 3.25                                 | 3.23    | 3.20         | 3.28 | 3.16         | 3.34 |
