# Supplementary material for: Bayesian refinement of protein structures and ensembles against SAXS data using molecular dynamics
Source: PubMed Central journal article supplement (PMC5662244; doi:10.1371/journal.pcbi.1005800), 2017-10-18
Supplement: pcbi.1005800.s010.pdf [file pcbi.1005800.s010.pdf]

Table S4: Maxima and confidence intervals of  $w_{\text{open}}$  taken from  $p(w_{\text{open}}|D, K)$  of the two-state ensemble refinement of Hsp90. All numbers in %. The respective posteriors are shown in Fig. 4D of the main text.

| System       | maximum | 65% interval |     | 95% interval |     |
|--------------|---------|--------------|-----|--------------|-----|
| Hsp90+AMPPNP | 32      | 17           | 51  | 4            | 73  |
| Hsp90+ATP    | 52      | 35           | 71  | 16           | 90  |
| apo Hsp90    | 94      | 78           | 100 | 59           | 100 |
